# Supplementary material for: An excellently stable TbIII–organic framework with outstanding stability as a rapid, reversible, and multi-responsive luminescent sensor in water
Source: Royal Society of Chemistry journal article supplement (doi:10.1039/c9dt02921d), 2019-01-01
Supplement: c9dt02921d1.pdf [file c9dt02921d1.pdf]

## Supporting Information

# **An excellently stable Tb<sup>III</sup>-organic framework with outstanding stability for rapid, reversible, and multi-responsive luminescent sensor in water**

Feng Guo,<sup>[a]\*</sup> Changhua Su,<sup>[b]</sup> Yuhang Fan,<sup>[a]</sup> and Wenbing Shi<sup>[a]</sup>

<sup>a</sup> *School of Chemistry and Chemical Engineering, Yangtze Normal University, Chongqing 408100, China.*

<sup>a</sup> *Chongqing Key Laboratory of Inorganic Special Functional Materials, College of Chemistry and Chemical Engineering, Yangtze Normal University, Fuling, Chongqing 408100, China. E-mail: guofeng1510@yeah.net.*

<sup>b</sup> *School of Materials Science and Engineering, Liaocheng University, Liaocheng, Shandong, 252059, China.*

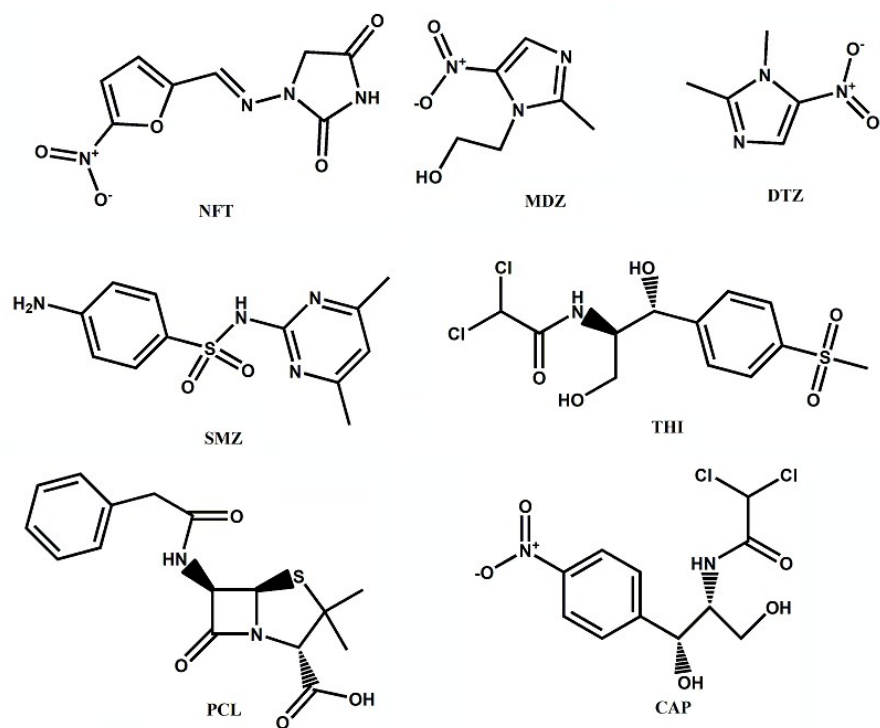

**Figure S1.** The structures of selected antibiotics.
